# Supplementary material
Source: PubMed Central journal article supplement (PMC4157111)
Supplement: NIHMS613275-supplement-1.pdf [file NIHMS613275-supplement-1.pdf]

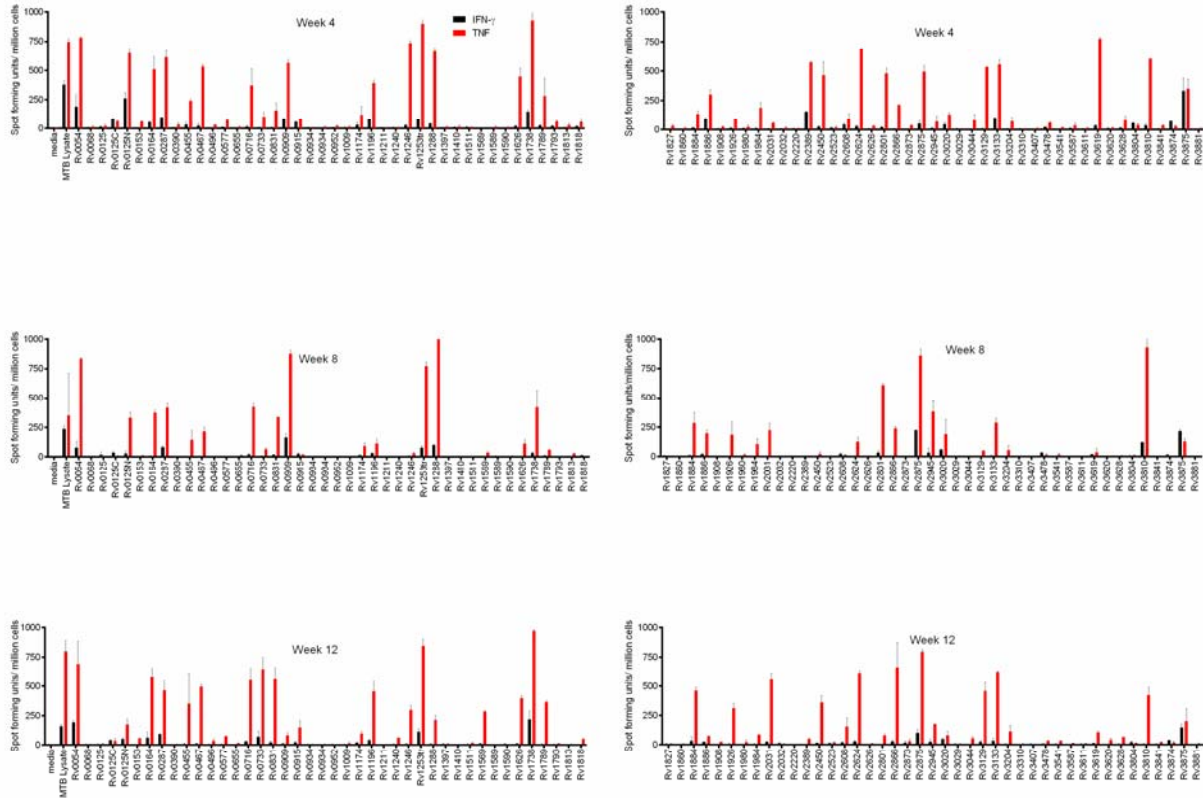

**Figure S1: Kinetics of T cell responses to select *Mtb* proteins**

IFN- $\gamma$  and TNF responses to recombinant *Mtb* proteins by splenocytes from mice four, eight, or twelve weeks after aerosolized *Mtb* infection. Data show results from one of two experiments with similar results (N=4 animals/timepoint).

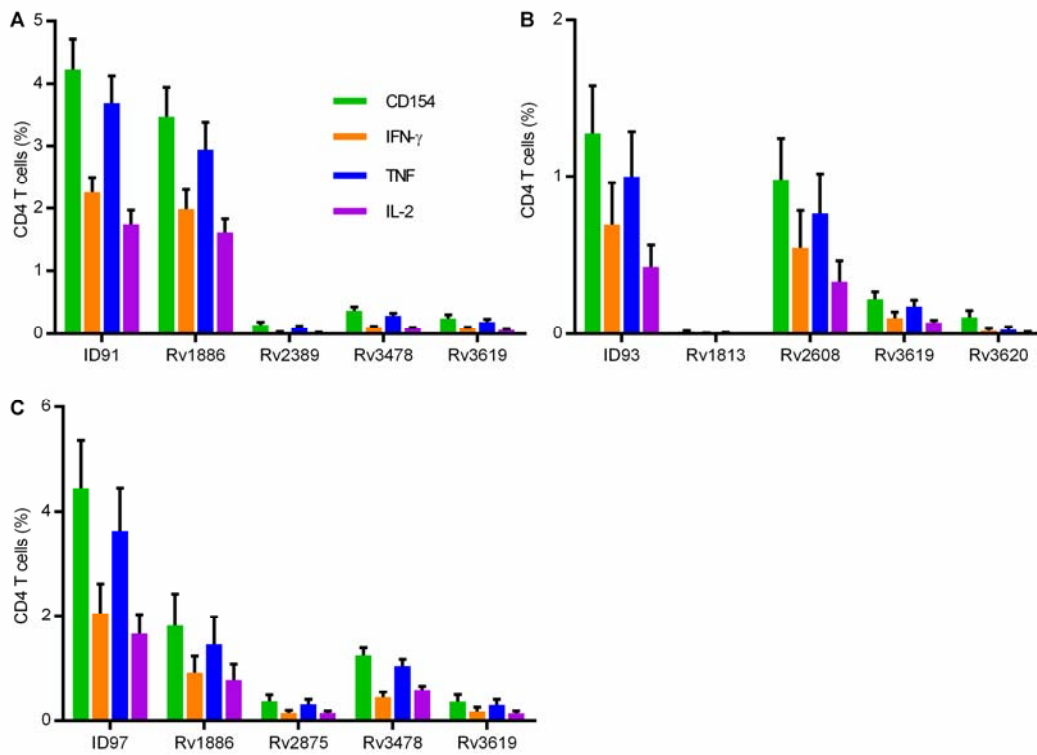

**Figure S2: CD4 T cell responses to fusion protein components in immunized mice**

Cohorts of five mice per group were immunized three times with the fusion proteins (A) ID91, (B) ID93, or (C) ID97 adjuvanted with GLA-SE. One month after the final immunization antigen specific CD4 T cells were identified by CD154, IFN- $\gamma$ , TNF or IL-2 expression by flow cytometry following *ex-vivo* stimulation with the cognate fusion antigen as well as each component protein of the fusion protein. Data show results from one of two experiments with similar results.
